# Supplementary material for: Staphylococcus epidermidis recovered from indwelling catheters exhibit enhanced biofilm dispersal and “self-renewal” through downregulation of agr
Source: PubMed Central journal article supplement (PMC3458918; doi:10.1186/1471-2180-12-102), 2012-06-08
Supplement: 1471-2180-12-102-S4.pdf [file 1471-2180-12-102-S4.pdf]

Section 1

|               | (1) | 1  | 10           | 20    | 30           | 40          | 51         |
|---------------|-----|----|--------------|-------|--------------|-------------|------------|
| ATCC35984_Agr | (1) | -- | NNNNNNNNNNNN | NAGCG | AAANTACTCTCC | CATATTTT    | TA-TATTGTA |
| Se-2_Agr      | (1) | -- | NNNNNNNNNNNN | AAGCG | ANNNN-CTCTCC | CATATTTT    | TA-TATTGTA |
| Se-1_Agr      | (1) | N  | NNNNNNNNNNNN | AAGCG | AAAATACTCTCC | CATATTTT    | TA-TATTGTA |
| Se-3_Agr      | (1) | -  | NNNNNNNNNNNN | AAGCG | NNNNNACN     | CNNCNTATTTT | NNANATTGTA |
| Consensus     | (1) |    | NNNNNNNNNNNN | AAGCG | ANNNTACTCTCC | CATATTTT    | TA TATTGTA |

Section 2

|               | (52) | 52 | 60           | 70            | 80          | 90         | 102    |
|---------------|------|----|--------------|---------------|-------------|------------|--------|
| ATCC35984_Agr | (48) | -  | TCGTAGTTATTT | CATTAGTAACTAA | AAGAACCGGTA | AAATAAACTT | ATTTTA |
| Se-2_Agr      | (48) | -  | TCGTAGTTATTT | CATTAGTAACTAA | AAGAACCGGTA | AAATAAACTT | ATTTTA |
| Se-1_Agr      | (51) | -  | TCGTAGTTATTT | CATTAGTAACTAA | AAGAACCGGTA | AAATAAACTT | ATTTTA |
| Se-3_Agr      | (51) | A  | TCGTAGTTATTT | CATTAGTAACTAA | AAGAACCGGTA | AAATAAACTT | ATTTTA |
| Consensus     | (52) |    | TCGTAGTTATTT | CATTAGTAACTAA | AAGAACCGGTA | AAATAAACTT | ATTTTA |

Section 3

|               | (103) | 103 | 110            | 120           | 130          | 140         | 153 |
|---------------|-------|-----|----------------|---------------|--------------|-------------|-----|
| ATCC35984_Agr | (98)  |     | TTCCGGTGTAATTT | TAGAATCTTTAAC | ATTACTACCCAT | CTTTTTCCCTA | AG  |
| Se-2_Agr      | (98)  |     | TTCCGGTGTAATTT | TAGAATCTTTAAC | ATTACTACCCAT | CTTTTTCCCTA | AG  |
| Se-1_Agr      | (101) |     | TTCCGGTGTAATTT | TAGAATCTTTAAC | ATTACTACCCAT | CTTTTTCCCTA | AG  |
| Se-3_Agr      | (102) |     | TTCCGGTGTAATTT | TAGAATCTTTAAC | ATTACTACCCAT | CTTTTTCCCTA | AG  |
| Consensus     | (103) |     | TTCCGGTGTAATTT | TAGAATCTTTAAC | ATTACTACCCAT | CTTTTTCCCTA | AG  |

Section 4

|               | (154) | 154 | 160          | 170          | 180         | 190         | 204      |
|---------------|-------|-----|--------------|--------------|-------------|-------------|----------|
| ATCC35984_Agr | (149) |     | GAGGATATTAAT | CATGGAAAACAT | TTTTAATTTAT | TTTATAAAAAT | TTTTTCAC |
| Se-2_Agr      | (149) |     | GAGGATATTAAT | CATGGAAAACAT | TTTTAATTTAT | TTTATAAAAAT | TTTTTCAC |
| Se-1_Agr      | (152) |     | GAGGATATTAAT | CATGGAAAACAT | TTTTAATTTAT | TTTATAAAAAT | TTTTTCAC |
| Se-3_Agr      | (153) |     | GAGGATATTAAT | CATGGAAAACAT | TTTTAATTTAT | TTTATAAAAAT | TTTTTCAC |
| Consensus     | (154) |     | GAGGATATTAAT | CATGGAAAACAT | TTTTAATTTAT | TTTATAAAAAT | TTTTTCAC |

Section 5

|               | (205) | 205 | 210          | 220           | 230          | 240         | 255  |
|---------------|-------|-----|--------------|---------------|--------------|-------------|------|
| ATCC35984_Agr | (200) |     | TACAATCTTGGA | ATTTATTGGTACT | GTAGCAGGAGAT | AGTGTATGTGC | CTC  |
| Se-2_Agr      | (200) |     | TACAATCTTGGA | ATTTATTGGTACT | GTAGCAGGAGAT | AGTGTATGTGC | CTC  |
| Se-1_Agr      | (203) |     | TACAATCTTGGA | ATTTATTGGTACT | GTAGCAGGAGAT | AGTGTATGTGC | CTC  |
| Se-3_Agr      | (204) |     | TACAATCTTGGA | ATTTATTGGTACT | GTAGCAGGAGAT | AGTGTATGTGC | CTC  |
| Consensus     | (205) |     | TACAATCTTGGA | ATTTATTGGTACT | GTAGCAGGAGAT | AGTGTATGTGC | CTTC |

Section 6

|               | (256) | 256 | 270          | 280          | 290          | 306             |
|---------------|-------|-----|--------------|--------------|--------------|-----------------|
| ATCC35984_Agr | (251) |     | TTACTTTGACGA | ACCAGAAGTACC | AGAAGAACTGAC | TAACTATAACGAGTA |
| Se-2_Agr      | (251) |     | TTACTTTGACGA | ACCAGAAGTACC | AGAAGAACTGAC | TAACTATAACGAGTA |
| Se-1_Agr      | (254) |     | TTACTTTGACGA | ACCAGAAGTACC | AGAAGAACTGAC | TAACTATAACGAGTA |
| Se-3_Agr      | (255) |     | TTACTTTGACGA | ACCAGAAGTACC | AGAAGAACTGAC | TAACTATAACGAGTA |
| Consensus     | (256) |     | TTACTTTGACGA | ACCAGAAGTACC | AGAAGAACTGAC | TAACTATAACGAGTA |

Section 7

|               | (307) | 307 | 320        | 330         | 340         | 357                |
|---------------|-------|-----|------------|-------------|-------------|--------------------|
| ATCC35984_Agr | (302) |     | AATATAACCC | TAGAAAGTGTG | TAAAGATATGG | ATGATATTAATCTATTTC |
| Se-2_Agr      | (302) |     | AATATAACCC | TAGAAAGTGTG | TAAAGATATGG | ATGATATTAATCTATTTC |
| Se-1_Agr      | (305) |     | AATATAACCC | TAGAAAGTGTG | TAAAGATATGG | ATGATATTAATCTATTTC |
| Se-3_Agr      | (306) |     | AATATAACCC | TAGAAAGTGTG | TAAAGATATGG | ATGATATTAATCTATTTC |
| Consensus     | (307) |     | AATATAACCC | TAGAAAGTGTG | TAAAGATATGG | ATGATATTAATCTATTTC |

Section 8

|               |       |                                                     |     |     |     |     |
|---------------|-------|-----------------------------------------------------|-----|-----|-----|-----|
|               | (358) | 358                                                 | 370 | 380 | 390 | 408 |
| ATCC35984_Agr | (353) | TTTGCAGGCCTACAAATCTTTTAAATGATTTGGGTTACTAAAGTTATCATT |     |     |     |     |
| Se-2_Agr      | (353) | TTTGCAGGCCTACAAATCTTTTAAATGATTTGGGTTACTAAAGTTATCATT |     |     |     |     |
| Se-1_Agr      | (356) | TTTGCAGGCCTACAAATCTTTTAAATGATTTGGGTTACTAAAGTTATCATT |     |     |     |     |
| Se-3_Agr      | (357) | TTTGCAGGCCTACAAATCTTTTAAATGATTTGGGTTACTAAAGTTATCATT |     |     |     |     |
| Consensus     | (358) | TTTGCAGGCCTACAAATCTTTTAAATGATTTGGGTTACTAAAGTTATCATT |     |     |     |     |

Section 9

|               |       |                                                     |     |     |     |     |
|---------------|-------|-----------------------------------------------------|-----|-----|-----|-----|
|               | (409) | 409                                                 | 420 | 430 | 440 | 459 |
| ATCC35984_Agr | (404) | AATATGAAATTTAATTTTAGGGATTACATAATCGTTTTTACGATTGTAATC |     |     |     |     |
| Se-2_Agr      | (404) | AATATGAAATTTAATTTTAGGGATTACATAATCGTTTTTACGATTGTAATC |     |     |     |     |
| Se-1_Agr      | (407) | AATATGAAATTTAATTTTAGGGATTACATAATCGTTTTTACGATTGTAATC |     |     |     |     |
| Se-3_Agr      | (408) | AATATGAAATTTAATTTTAGGGATTACATAATCGTTTTTACGATTGTAATC |     |     |     |     |
| Consensus     | (409) | AATATGAAATTTAATTTTAGGGATTACATAATCGTTTTTACGATTGTAATC |     |     |     |     |

Section 10

|               |       |                                                      |     |     |     |     |     |
|---------------|-------|------------------------------------------------------|-----|-----|-----|-----|-----|
|               | (460) | 460                                                  | 470 | 480 | 490 | 500 | 510 |
| ATCC35984_Agr | (455) | CCTTCTGCAATAATGTATTACTTTTGGCAAAGTAAAGCATTAAATAGTTTTG |     |     |     |     |     |
| Se-2_Agr      | (455) | CCTTCTGCTATAATGTATTACTTTTGGCAAAGTAAAGCATTAAATAGTTTTG |     |     |     |     |     |
| Se-1_Agr      | (458) | CCTTCTGCTATAATGTATTACTTTTGGCAAAGTAAAGCATTAAATAGTTTTG |     |     |     |     |     |
| Se-3_Agr      | (459) | CCTTCTGCTATAATGTATTACTTTTGGCAAAGTAAAGCATTAAATAGTTTTG |     |     |     |     |     |
| Consensus     | (460) | CCTTCTGCTATAATGTATTACTTTTGGCAAAGTAAAGCATTAAATAGTTTTG |     |     |     |     |     |

Section 11

|               |       |                                                      |     |     |     |     |     |
|---------------|-------|------------------------------------------------------|-----|-----|-----|-----|-----|
|               | (511) | 511                                                  | 520 | 530 | 540 | 550 | 561 |
| ATCC35984_Agr | (506) | GTTATAATAATCAACCATTTTCTTTTATACAAAATAAAAGCTTTATTCAATA |     |     |     |     |     |
| Se-2_Agr      | (506) | GTTATAATAATCAATAATTTTCTTTTATACAAAATAAAAGCTTTATTCAATA |     |     |     |     |     |
| Se-1_Agr      | (509) | GTTATAATAATCAATAATTTTCTTTTATACAAAATAAAAGCTTTATTCAATA |     |     |     |     |     |
| Se-3_Agr      | (510) | GTTATAATAATCAATAATTTTCTTTTATACAAAATAAAAGCTTTATTCAATA |     |     |     |     |     |
| Consensus     | (511) | GTTATAATAATCAATAATTTTCTTTTATACAAAATAAAAGCTTTATTCAATA |     |     |     |     |     |

Section 12

|               |       |                                                      |     |     |     |     |     |
|---------------|-------|------------------------------------------------------|-----|-----|-----|-----|-----|
|               | (562) | 562                                                  | 570 | 580 | 590 | 600 | 612 |
| ATCC35984_Agr | (557) | TTAGTTGTATTATTCACCACTATGATCTTATATATAACTAATTTTCATAACT |     |     |     |     |     |
| Se-2_Agr      | (557) | TTAGTTGTATTATTCACCACTATGATCTTATATATAACTAATTTTCATAACT |     |     |     |     |     |
| Se-1_Agr      | (560) | TTAGTTGTATTATTCACCACTATGATCTTATATATAACTAATTTTCATAACT |     |     |     |     |     |
| Se-3_Agr      | (561) | TTAGTTGTATTATTCACCACTATGATCTTATATATAACTAATTTTCATAACT |     |     |     |     |     |
| Consensus     | (562) | TTAGTTGTATTATTCACCACTATGATCTTATATATAACTAATTTTCATAACT |     |     |     |     |     |

Section 13

|               |       |                                                       |     |     |     |     |     |
|---------------|-------|-------------------------------------------------------|-----|-----|-----|-----|-----|
|               | (613) | 613                                                   | 620 | 630 | 640 | 650 | 663 |
| ATCC35984_Agr | (608) | GTATACATACATTTGACTATAAAAAGATTATATTCCGTTTAAATTTGCTTTTA |     |     |     |     |     |
| Se-2_Agr      | (608) | GTATACATACATTTAACTATAAAAAGATTATATTCCGTTTAAATTTGTTTTA  |     |     |     |     |     |
| Se-1_Agr      | (611) | GTATACATACATTTAACTATAAAAAGATTATATTCCGTTTAAATTTGTTTTA  |     |     |     |     |     |
| Se-3_Agr      | (612) | GTATACATACATTTAACTATAAAAAGATTATATTCCGTTTAAATTTGTTTTA  |     |     |     |     |     |
| Consensus     | (613) | GTATACATACATTTAACTATAAAAAGATTATATTCCGTTTAAATTTGTTTTA  |     |     |     |     |     |

Section 14

|               |       |                                                       |     |     |     |     |     |
|---------------|-------|-------------------------------------------------------|-----|-----|-----|-----|-----|
|               | (664) | 664                                                   | 670 | 680 | 690 | 700 | 714 |
| ATCC35984_Agr | (659) | CAGTTAATACATTTTACCTCTTTTGTAAATCATAACTCANN-TTATTGCTTAT |     |     |     |     |     |
| Se-2_Agr      | (659) | CAGTTAATACATTTTACCTTTTTTGTAAATCATAACTCANN-TCATTGCTTAT |     |     |     |     |     |
| Se-1_Agr      | (662) | CAGTTAATACATTTTACCTTTTTTGTAAATCATAACTCTNATCATTGCTTAT  |     |     |     |     |     |
| Se-3_Agr      | (663) | CAGTTAATACATTTTACCTTTTTTGTAAATCATAACTCTAATCATTGCTTAT  |     |     |     |     |     |
| Consensus     | (664) | CAGTTAATACATTTTACCTTTTTTGTAAATCATAACTCTNATCATTGCTTAT  |     |     |     |     |     |

Section 15

|               |       |                                             |     |     |     |     |     |             |
|---------------|-------|---------------------------------------------|-----|-----|-----|-----|-----|-------------|
|               | (715) | 715                                         | 720 | 730 | 740 | 750 | 765 |             |
| ATCC35984_Agr | (709) | TTAACTCAACTATN GTTCAATAAATTAAAAGTATCCTA CT  |     |     |     |     |     | TGTCACTCAAT |
| Se-2_Agr      | (709) | TTAACTCAACTATN GTTCAATAAATTAAAAGTATCCTA TC  |     |     |     |     |     | TGTCACTCAAT |
| Se-1_Agr      | (713) | TTAACTCAACTAT T GTTCAATAAATTAAAAGTATCCTA TC |     |     |     |     |     | TGTCACTCAAT |
| Se-3_Agr      | (714) | TTAACTCAACTAT T GTTCAATAAATTAAAAGTATCCTA TC |     |     |     |     |     | TGTCACTCAAT |
| Consensus     | (715) | TTAACTCAACTATT GTTCAATAAATTAAAAGTATCCTATCT  |     |     |     |     |     | TGTCACTCAAT |

Section 16

|               |       |                                                  |     |     |     |     |          |
|---------------|-------|--------------------------------------------------|-----|-----|-----|-----|----------|
|               | (766) | 766                                              | 780 | 790 | 800 | 816 |          |
| ATCC35984_Agr | (760) | AAAAGATACTTATT GATAATAACAAT A GTACTTTT CATATCN - |     |     |     |     | NTATTTTA |
| Se-2_Agr      | (760) | AAAAGATACTTATT CATAATAACAAT T GTACTTTT TATATCACT |     |     |     |     | TATTTTA  |
| Se-1_Agr      | (764) | AAAAGATACTTATT CATAATAACAAT T GTACTTTT TATATCN - |     |     |     |     | NTATTTTA |
| Se-3_Agr      | (765) | AAAAGATACTTATT CATAATAACAAT T GTACTTTT TATATCN - |     |     |     |     | NTATTTTA |
| Consensus     | (766) | AAAAGATACTTATT CATAATAACAATT GTACTTTT TATATCN    |     |     |     |     | NTATTTTA |

Section 17

|               |       |                                              |     |     |     |     |           |
|---------------|-------|----------------------------------------------|-----|-----|-----|-----|-----------|
|               | (817) | 817                                          | 830 | 840 | 850 | 867 |           |
| ATCC35984_Agr | (810) | CTTTATATGGTGT CACAACTGATATGCGAGGAAATGATAC C  |     |     |     |     | CTTAAATTA |
| Se-2_Agr      | (811) | CTTTATATGGTGT CACAACTGATATGCGAGGAAATGATAC A  |     |     |     |     | CTTAAATTA |
| Se-1_Agr      | (814) | CTTTATATGGTGT CACAACTGATATGCGAGGAAATGATAC A  |     |     |     |     | CTTAAATTA |
| Se-3_Agr      | (815) | CTTTATATGGTGT CACAACTGATATGCGAGGAAATGATAC A  |     |     |     |     | CTTAAATTA |
| Consensus     | (817) | CTTTATATGGTGT CACAACTGATATGCGAGGAAATGATACACT |     |     |     |     | TTAAATTA  |

Section 18

|               |       |                                       |     |     |     |     |                           |
|---------------|-------|---------------------------------------|-----|-----|-----|-----|---------------------------|
|               | (868) | 868                                   | 880 | 890 | 900 | 918 |                           |
| ATCC35984_Agr | (861) | TATGCCATCT TATT GTTGGGNA TTA TNNN -   |     |     |     |     | TTTTTT - - TAGTGT ACN GNN |
| Se-2_Agr      | (862) | TATGCCATCT NNT - GATGGGN TNNANNNG -   |     |     |     |     | TTTTTT AANNNG NNNAGN GAN  |
| Se-1_Agr      | (865) | TATGCCATCT TGT T GANGGGN NNT TNNNG    |     |     |     |     | TTTTTT TAANNNG TANNGNAT   |
| Se-3_Agr      | (866) | TATGCCATCT TGT T GANGGNN N T TNNNGN - |     |     |     |     | TTTTTT TANN TNNNG GNNAT   |
| Consensus     | (868) | TATGCCATCTT GTTGATGGGNNTTANNNG        |     |     |     |     | TTTTTTTANNNNNNNAGNNAT     |

Section 19

|               |       |                                                           |     |     |     |     |                                 |
|---------------|-------|-----------------------------------------------------------|-----|-----|-----|-----|---------------------------------|
|               | (919) | 919                                                       | 930 | 940 | 950 | 969 |                                 |
| ATCC35984_Agr | (908) | AA T GAN GAT GTC N AATN TACACANNNN GACTTG N               |     |     |     |     | NNNNNNNNNNNNNNNN                |
| Se-2_Agr      | (911) | N T T N A G N G N T G G T N C A A T T N N N N N N N N N N |     |     |     |     | N N N N N N N N N N N N N N     |
| Se-1_Agr      | (916) | T N T N G N N G A G N N N N A N G T T N N N N N N N N N N |     |     |     |     | G N N N N N N N N N N N N N N   |
| Se-3_Agr      | (916) | N N T G N T T G A N N G T N N N G T T N N N N N N N N N N |     |     |     |     | N N N N N N N N N N N N N N A N |
| Consensus     | (919) | NNTNANNGATNGTNANGTTNNNNNNNNNNNNNNNNNNNNNNNN               |     |     |     |     | NNNNNNNNNNNNNNNN                |

Section 20

|               |       |                                                                     |     |     |      |  |
|---------------|-------|---------------------------------------------------------------------|-----|-----|------|--|
|               | (970) | 970                                                                 | 980 | 990 | 1001 |  |
| ATCC35984_Agr | (959) | NNNNNN - - - - - - - - - - - - - - - - - - - - - - - - - - - - - -  |     |     |      |  |
| Se-2_Agr      | (962) | ANN GNN NAGAAATC NNNN N NNN TNNNANNNNN                              |     |     |      |  |
| Se-1_Agr      | (967) | NNNNNNNNNNNNNNNN - - - - - - - - - - - - - - - - - - - - - - - -    |     |     |      |  |
| Se-3_Agr      | (967) | NANNNNNNNNNNNNNNNAN - - - - - - - - - - - - - - - - - - - - - - - - |     |     |      |  |
| Consensus     | (970) | NNNNNNNNNNNNNNNN N                                                  |     |     |      |  |
